# Supplementary material
Source: HighWire-hosted journal article supplement (https://sti.bmj.com/content/99/2/104)
Supplement: inline-supplementary-material-2 [file inline-supplementary-material-2.xlsx]

## Sheet: hpv.survey
Section	Column	Chinese	English	Answer Key
	A	A00 采样日期：	Sampling date	Date
Demographic Factors	B	A01 请问您截止到今天的周岁是?	What is your year of birth?	Number
	C	A02 您的出生性别是？	What is your sex at birth?	1=male
	D	A03 过去一年内，您是否曾与男性发生过肛交性行为?	Have you ever had sexual intercourse with a man in the past one year?	1=yes
	E	医生采集样品编号（双数）：	Clinician-sampling ID	character
	F	自我采集样品编号：	Self-sampling ID	character
	G	B01 请问您目前的婚姻状况是？	What is your marital status?	0=single;1=engaged or married;2=divorced or separate
	H	B02 您所完成的最高学历是？	Your level of education is?	0=high school or below high school; 1=college;2=graduate
	I	B03 您每个月的个人收入大概有多少？	What is your average monthly income?	0=less than 1500; 1=1500~3000; 2=3001~5000; 3=5001~8000;4=more than 8000
	J	B04 您认为自己的性取向是？	What is your sexual orientation?	0=homosexual; 1=heterosexual;2=bisexual;3=uncertain
Sexual intercourse history	K	C01 过去一年里，您曾与多少个不同的男性发生过肛交性行为？	In the past year, with how many men have you had anal sexual intercourse?	number
	L	C02 在过去一年里， 您与男性发生肛交性行为时，您的性角色是？	In the past year, what was your role when you had sex with men?	0=receptive (“0”); 1=insertive ("1"); 2=both
	M	C03 在过去一年里，您与男性发生肛交性行为时使用安全套的频率如何？	In the past year, how frequently did you use condoms when you had anal sexual intercourse with men?	0=never; 1=rarely (less than half the time); 2=frequenty (more than half the time; 3=every time
	N	C04 最近一次与男性发生肛交性行为时，您或对方是否使用了安全套？	Did you/partner use a condom the most recent time you had anal sex with a man?	0=no; 1=yes
	O	C05 在过去一年里， 您与男性发生性行为时，是否有口交性行为？	Have you had oral sex with a man in the past year?	0=no; 1=yes
	P	C06 最近一次与男性发生口交性行为时，您或对方是否使用了安全套？	Did you/partner use a condom the most recent time you had oral sex with a man?	0=no; 1=yes
	Q	C07 在过去一年里，您有多少个男性固定性伴？	In the past year, how many stable male partners did you have?	Number
	R	C08 您与男性固定性伴发生肛交性行为时使用安全套的频率如何？	In the past year, how frequently did you use condoms when you had sex with stable male partners?	0=never; 1=rarely (less than half the time); 2=frequenty (more than half the time; 3=every time
	S	C09 在过去一年里，您有多少个男性临时性伴？	In the past year, how many casual male partners did you have?	Number
	T	C10 您与男性临时性伴发生肛交性行为时使用安全套的频率如何？	In the past year, how frequently did you use condoms when you had sex with casual male partners?	0=never; 1=rarely (less than half the time); 2=frequenty (more than half the time; 3=every time
	U	D01 在过去一年里，您曾与多少个不同的女性发生过性行为？	With how many different women did you have sex in the past year?	Number
	V	D02 在过去一年里，您与女性发生性行为时使用安全套的频率如何？	In the past year, how frequent did you use condoms when you had sex with women?	0=never; 1=rarely (less than half the time); 2=frequenty (more than half the time; 3=every time
	W	D03 最近一次，您与女性发生插入性性行为时使用安全套了吗？	Did you use a condom when you most recently had sex with a woman?	0=no; 1=yes
Drug use	X	E01 您是否使用过Rush，0号胶囊等其他类型的新型毒品（非医疗用途）？	have you ever used Rush, zero capsule,G point liquid or other drugs (exclude medical use)	0=no; 1=yes
	Y	E02 在过去一年里，您在使用任何上述新型毒品的次数是（非医疗用途）？	in the past year, how frenquency did you use the new drugs above?	0=never; 1=once or twice; 2=three to four times; 3=five to six times; 4= seven times or above
HIV testing experience	Z	F01 您是否做过HIV检测？	Have you ever tested for HIV?	0=no; 1=yes
	AA	F02 您上一次是在哪里做的HIV检测？	How did you test for HIV the previous time?	0=self test; 1=medical paid service ; 2=CBO; 3=blood donation institution test; 4=testing at CDC on the site
	AB	F03 您上一次的自检试剂是如何获得？	How did you obtain your previous self-test kit?	0=purchased from an online platform (e.g. Taobao ); 1=gift from a friend; 2=purchased from a pharmacy; 3=through CDC or clinic; 4=MSM offline services
	AC	F04 您上一次是什么时候做的HIV检测？	When was the last time you tested for HIV?	0= <3mo; 1= 3-6mo; 2=>6mo
	AD	F05 您知道上一次的检测结果吗？	Do you know your last test result?	0=yes, negative; 1=yes, positive; 2=don't know
HPV testing experience	AE	F06 您是否做过HPV检测？	Have you ever tested for HPV?	0=no; 1=yes
	AF	F07 您上一次是在哪里做的HPV检测？	How did you test for HPV the previous time?	0= hospital; 1= CBO; 2= CDC; 3= At home
	AG	F08 您上一次是什么时候做的HPV检测？	When was the last time you tested for HPV?	0= <3mo; 1= 3-6mo; 2=>6mo
	AH	F09 您知道上一次的检测结果吗？	Do you know your last test result?	0=yes, negative; 1=yes, positive; 2=don't know
	AI	F10 您是否接种过HPV疫苗？	Have you got HPV vaccine?	0=no; 1=yes
HPV Testing Social Norm	AJ	如果别人知道我在进行HPV检测，他们会觉得我的性生活比较随便	If other people know I tested for HPV, they will think I am promiscuity.	1= Strongly disagree; 2=disagree; 3= neutral; 4= agree; 5= strongly agree
	AK	如果别人知道我在进行HPV检测，他们会觉得我是个“坏人”	If other people know I tested for HPV, they will think I am a bad guy.	1= Strongly disagree; 2=disagree; 3= neutral; 4= agree; 5= strongly agree
	AL	如果别人知道我在进行HPV检测，他们会怀疑我的性取向	If other people know I tested for HPV, they will question my sexual orientation.	1= Strongly disagree; 2=disagree; 3= neutral; 4= agree; 5= strongly agree
	AM	如果别人知道我在进行HPV检测，他们会觉得我感染了HPV	If other people know I tested for HPV, they will think I am infected with HPV.	1= Strongly disagree; 2=disagree; 3= neutral; 4= agree; 5= strongly agree
	AN	如果别人知道我在进行HPV检测，我会觉得比较羞耻	If other people know I tested for HPV, I will feel ashamed.	1= Strongly disagree; 2=disagree; 3= neutral; 4= agree; 5= strongly agree
	AO	我的性伴侣会同意让我进行HPV检测	My sexual partner(s) will allow me to test for HPV.	1= Strongly disagree; 2=disagree; 3= neutral; 4= agree; 5= strongly agree
	AP	我的家人会同意让我进行HPV检测	My family will allow me to test for HPV.	1= Strongly disagree; 2=disagree; 3= neutral; 4= agree; 5= strongly agree
	AQ	我的朋友们会同意让我进行HPV检测	My friend(s) will allow me to test for HPV.	1= Strongly disagree; 2=disagree; 3= neutral; 4= agree; 5= strongly agree
Self-Efficacy	AR	当您不能及时知道您的HPV检测结果时，请问您有多大信心继续选择进行HPV检测？	When you cannot know your HPV test result immediately, how confident are you that you will continue to do the HPV test?	1= Strongly confident; 2= quite confident; 3= neutral; 4= quite unconfident; 5= strongly unconfident
	AS	当您最近有服用其他药物或者饮酒时，请问您有多大信心继续选择进行HPV检测？	When you have recently taken other medicine or drank alcohol, how confident are you that you will continue to do the HPV test?	1= Strongly confident; 2= quite confident; 3= neutral; 4= quite unconfident; 5= strongly unconfident
	AT	当您的伴侣对我进行检测这件事感到不开心时，请问您有多大信心继续选择进行HPV检测？	When your partner feel unhappy that you will test for HPV, how confident are you that you will continue to do the HPV test?	1= Strongly confident; 2= quite confident; 3= neutral; 4= quite unconfident; 5= strongly unconfident
	AU	当您担心检测本身有副作用时，请问您有多大信心继续选择进行HPV检测？	When you are worried about the side effects regarding HPV test, how confident are you that you will continue to do the HPV test?	1= Strongly confident; 2= quite confident; 3= neutral; 4= quite unconfident; 5= strongly unconfident
	AV	当您觉得“预防HPV感染”是一件很麻烦的事时，请问您有多大信心继续选择进行HPV检测？	When you feel "HPV prevention" is a very troublesome thing, how confident are you that you will continue to do the HPV test?	1= Strongly confident; 2= quite confident; 3= neutral; 4= quite unconfident; 5= strongly unconfident
	AW	当您认为我感染HPV的风险非常低时，请问您有多大信心继续选择进行HPV检测？	When you feel that the risk of you infecting with HPV is very low, how confident are you that you will continue to do the HPV test?	1= Strongly confident; 2= quite confident; 3= neutral; 4= quite unconfident; 5= strongly unconfident
	AX	当您正在使用HPV预防措施（如安全套）时，请问您有多大信心继续选择进行HPV检测？	When you are using HPV prevention methods (e.g. condom), how confident are you that you will continue to do the HPV test?	1= Strongly confident; 2= quite confident; 3= neutral; 4= quite unconfident; 5= strongly unconfident
	AY	当您的朋友告诉我男性不需要进行检测时，请问您有多大信心继续选择进行HPV检测？	When your friends tell you men does not need to test for HPV, how confident are you that you will continue to do the HPV test?	1= Strongly confident; 2= quite confident; 3= neutral; 4= quite unconfident; 5= strongly unconfident
	AZ	当您上一次的检测结果为阴性时，请问您有多大信心继续选择进行HPV检测？	When your last test result of HPV is negative, how confident are you that you will continue to do the HPV test?	1= Strongly confident; 2= quite confident; 3= neutral; 4= quite unconfident; 5= strongly unconfident
	BA	当您不方便去医院进行HPV检测时，请问您有多大信心继续选择进行HPV检测？	When it is not convenient for you to go to the hospital for HPV testing, how confident are you that you will continue to do the HPV test?	1= Strongly confident; 2= quite confident; 3= neutral; 4= quite unconfident; 5= strongly unconfident
	BB	当检测是自费时，请问您有多大信心继续选择进行HPV检测？	When HPV test is free, how confident are you that you will continue to do the HPV test?	1= Strongly confident; 2= quite confident; 3= neutral; 4= quite unconfident; 5= strongly unconfident
HPV testing result	BC	请问您本次参加HPV检测的地点是？	Where do you get test for HPV this time?	0=Zhuhai; 1= Jiangmen; 2=Shenzhen
	BE	L01 您此次的HPV检测结果是：	The result of your test this time	0=negative; 1=positive
	BF	高危型亚型：	High risk HPV type	character
	BG	低危型亚型：	Low risk HPV type	character
	BI	查询码	confirmation code	Number
	BK	医采阳性	HPV-positive via clinician-sampling test	0=no; 1=yes
	BL	自采阳性	HPV-positive via self-sampling test	0=no; 1=yes
